# Supplementary material
Source: PubMed Central journal article supplement (PMC6862955)
Supplement: Supp_Table1-2.pdf [file Supp_Table1-2.pdf]

## Supplementary Data

SUPPLEMENTARY TABLE S1. MEDIAN TIME IN SECONDS TO COMPLETE 4-M WALK BY GAIT SPEED TRAJECTORY GROUP

| Year     | <i>Persistently normal gait</i> | <i>Development of slow gait</i> | <i>Resolution of slow gait</i> | <i>Persistently slow gait</i> | <i>Total</i> |
|----------|---------------------------------|---------------------------------|--------------------------------|-------------------------------|--------------|
|          | (n=813)                         | (n=52)                          | (n=38)                         | (n=26)                        | (n=929)      |
| Baseline | 3.73                            | 4.63                            | 5.87                           | 6.24                          | 3.83         |
| Year 1   | 3.78                            | 5.32                            | 4.97                           | 6.19                          | 3.89         |
| Year 2   | 3.83                            | 5.45                            | 4.99                           | 6.19                          | 3.93         |
| Year 3   | 3.88                            | 5.98                            | 4.75                           | 6.79                          | 4.00         |

SUPPLEMENTARY TABLE S2. AGE-ADJUSTED ANALYSIS OF ASSOCIATIONS BETWEEN BASELINE COVARIATES AND GAIT SPEED TRAJECTORY GROUPS

| <i>Baseline characteristics</i>                           | <i>Development of slow gait</i><br>(OR, 95% CI) | <i>Resolution of slow gait</i><br>(OR, 95% CI) |
|-----------------------------------------------------------|-------------------------------------------------|------------------------------------------------|
| Age (years)                                               | 1.01 (0.97–1.04) <i>p</i> = .74                 | 0.93 (0.88–0.99) <i>p</i> = .023               |
| Female                                                    | <b>2.78 (1.53–5.03) <i>p</i> = .001</b>         | 0.41 (0.13–1.25) <i>p</i> = .12                |
| Race: Black vs. white                                     | <b>4.12 (2.09–8.12) <i>p</i> ≤ .001</b>         | 0.55 (0.17–1.72) <i>p</i> = .30                |
| Race: Hispanic vs. white                                  | <b>2.18 (0.96–4.98) <i>p</i> = .063</b>         | 0.70 (0.15–3.36) <i>p</i> = .66                |
| Education (≥12 years)                                     | <b>0.53 (0.27–1.04) <i>p</i> = .064</b>         | 1.00 (0.28–3.60) <i>p</i> = 1.00               |
| Hemoglobin A1C (%)                                        | <b>1.39 (1.10–1.75) <i>p</i> = .005</b>         | 0.81 (0.55–1.19) <i>p</i> = .29                |
| Body mass index (kg/m <sup>2</sup> )                      | <b>1.04 (0.99–1.09) <i>p</i> = .096</b>         | <b>0.92 (0.85–1.00) <i>p</i> = .038</b>        |
| High waist circumference                                  | <b>1.90 (1.08–3.34) <i>p</i> = .025</b>         | <b>0.41 (0.14–1.17) <i>p</i> = .094</b>        |
| Physical activity: ≥3 days on either vigorous or moderate | 0.83 (0.47–1.48) <i>p</i> = .54                 | 1.42 (0.45–4.48) <i>p</i> = .55                |
| Alcohol: heavy drinker vs. abstainer                      | 0.60 (0.27–1.36) <i>p</i> = .22                 | 1.62 (0.28–9.43) <i>p</i> = .59                |
| Alcohol: light drinker vs. abstainer                      | <b>0.44 (0.23–0.87) <i>p</i> = .019</b>         | 1.30 (0.37–4.55) <i>p</i> = .69                |
| Alcohol: moderate drinker vs. abstainer                   | 0.56 (0.17–1.91) <i>p</i> = .36                 | 0.92 (0.00, 1) <i>p</i> = 1.00                 |
| Substance use within past month at entry                  | 0.51 (0.22–1.15) <i>p</i> = .10                 | 0.77 (0.16–3.80) <i>p</i> = .75                |
| Anti-anxiety or depression medications                    | 0.98 (0.53–1.79) <i>p</i> = .94                 | 0.51 (0.18–1.44) <i>p</i> = .21                |
| Nadir CD4: 200–350 vs. <200 cells/μL                      | 0.71 (0.37–1.35) <i>p</i> = .29                 | 0.48 (0.16–1.46) <i>p</i> = .20                |
| Nadir CD4: >350 vs. <200 cells/μL                         | 0.66 (0.28–1.53) <i>p</i> = .33                 | 0.68 (0.15–2.98) <i>p</i> = .61                |
| NPZ3 score                                                | <b>0.62 (0.47–0.81) <i>p</i> = .001</b>         | 1.31 (0.81–2.10) <i>p</i> = .270               |
| NCI                                                       | <b>2.89 (1.55–5.38) <i>p</i> = .001</b>         | 1.11 (0.37–3.28) <i>p</i> = .86                |
| INSTI use at HAILO entry                                  | 1.03 (0.53–2.01) <i>p</i> = .92                 | 0.76 (0.24–2.39) <i>p</i> = .63                |
| TDF use at HAILO entry                                    | 0.95 (0.49–1.86) <i>p</i> = .88                 | 2.11 (0.73–6.13) <i>p</i> = .17                |
| PI use at HAILO entry                                     | 0.00 (0.00, 1) <i>p</i> = .99                   | 0.48 (0.04–5.78) <i>p</i> = .56                |
| INSTI use at randomization                                | 1.48 (0.67–3.27) <i>p</i> = .33                 | 0.52 (0.09–2.85) <i>p</i> = .45                |
| TDF use at randomization                                  | 1.23 (0.70–2.17) <i>p</i> = .47                 | 0.69 (0.24–1.93) <i>p</i> = .48                |
| PI use at randomization                                   | 0.65 (0.37–1.15) <i>p</i> = .14                 | 1.11 (0.41–3.03) <i>p</i> = .83                |
| Any previous exposure to DDI/D4T/AZT                      | 1.18 (0.66–2.11) <i>p</i> = .57                 | 2.20 (0.78–6.20) <i>p</i> = .13                |
| Cigarette use: current vs. never                          | 1.55 (0.80–3.00) <i>p</i> = .20                 | 0.42 (0.12–1.50) <i>p</i> = .18                |
| Cigarette use: former vs. never                           | 0.85 (0.42–1.72) <i>p</i> = .65                 | 0.51 (0.15–1.74) <i>p</i> = .28                |
| Suppressed VL (<50 copies/mL)                             | 0.81 (0.31–2.11) <i>p</i> = .66                 | 0.39 (0.04–3.77) <i>p</i> = .42                |
| Still on initial randomized therapy at HAILO entry        | 1.04 (0.58–1.86) <i>p</i> = .89                 | 0.46 (0.16–1.31) <i>p</i> = .15                |
| Peripheral neuropathy at HAILO entry                      | <b>1.72 (0.97–3.05) <i>p</i> = .064</b>         | 1.05 (0.36–3.04) <i>p</i> = .93                |

Characteristics were measured at baseline unless otherwise indicated. Covariates with *p* < .1 (*italicized* and in *bold*) were included in the final, multivariable models.

ART, antiretroviral therapy; AZT, zidovudine; CD4, CD4<sup>+</sup> T lymphocyte count; D4T, stavudine; DDI, didanosine; HAILO, HIV Infection, Aging, and Immune Function Long-term Observational Study; HIV, human immunodeficiency syndrome; INSTI, integrase strand transfer inhibitor; NCI, neurocognitive impairment; PI, protease inhibitor; TDF, tenofovir.
